# Supplementary material for: A combined theoretical and experimental investigation on the photocatalytic hydrogenation of CO2 on Cu/ZnO polar surface
Source: Royal Society of Chemistry journal article supplement (doi:10.1039/d3nr01001e), 2023-01-01
Supplement: d3nr01001e1.pdf [file d3nr01001e1.pdf]

## Supporting Information

### A combined theoretical and experimental investigation on the photocatalytic hydrogenation of CO<sub>2</sub> on Cu/ZnO polar surface

Han Xiao,<sup>a,b</sup> Yihong Lian,<sup>a,e</sup> Shiduo Zhang,<sup>a,e</sup> Minyi Zhang,<sup>\*a,b,e</sup> Jiye Zhang,<sup>\*c</sup> and Chunsen Li<sup>\*a,b,d,e</sup>

<sup>a</sup> State Key Laboratory of Structural Chemistry, Fujian Institute of Research on the Structure of Matter, Chinese Academy of Sciences, Fuzhou, Fujian 350002, China

<sup>b</sup> University of Chinese Academy of Sciences, Beijing 100049, China

<sup>c</sup> School of Materials Science and Engineering, Shanghai University, Shanghai 200444, China

<sup>d</sup> Fujian Provincial Key Laboratory of Theoretical and Computational Chemistry, Xiamen University, Xiamen, Fujian 361005, China

<sup>e</sup> Fujian College, University of Chinese Academy of Sciences, Fuzhou, Fujian 350002, China

**Table. S1** Adsorption energies (in eV) for Cu adsorbed on clean polar surfaces of ZnO(0001) and ZnO(000 $\bar{1}$ )

| Cu/ZnO           | top   | bridge | fcc   | hcp   |
|------------------|-------|--------|-------|-------|
| (0001)           | -2.44 | -2.57  | -2.86 | -2.79 |
| (000 $\bar{1}$ ) | -3.85 | -4.49  | -4.49 | -3.86 |

**Table. S2** Adsorption energies (in eV) for CO<sub>2</sub> and H<sub>2</sub> adsorbed on clean surface of ZnO(0001) and ZnO(000 $\bar{1}$ )

| Clean ZnO surface                | top   | bridge | fcc   | hcp   |
|----------------------------------|-------|--------|-------|-------|
| (0001)/CO <sub>2</sub>           | -0.08 | -0.04  | -0.05 | -0.06 |
| (0001)/H <sub>2</sub>            | -0.05 | -0.04  | -0.03 | -0.02 |
| (000 $\bar{1}$ )/CO <sub>2</sub> | -0.05 | -0.04  | -     | -     |
| (000 $\bar{1}$ )/H <sub>2</sub>  | -3.30 | -4.96  | -4.96 | -0.01 |

**Table. S3** Adsorption energies (in eV) of Cu<sub>9</sub> adsorbed on clean surface of ZnO(0001), CO<sub>2</sub> adsorbed on Cu<sub>9</sub>/ZnO(0001) surface, and H<sub>2</sub> adsorbed on Cu<sub>9</sub>/ZnO(0001) surface.

|                 | ZnO(0001) | Cu <sub>9</sub> /ZnO(0001) |
|-----------------|-----------|----------------------------|
| Cu <sub>9</sub> | -7.45     | -                          |
| CO <sub>2</sub> | -         | -0.80                      |
| H <sub>2</sub>  | -         | -0.27                      |

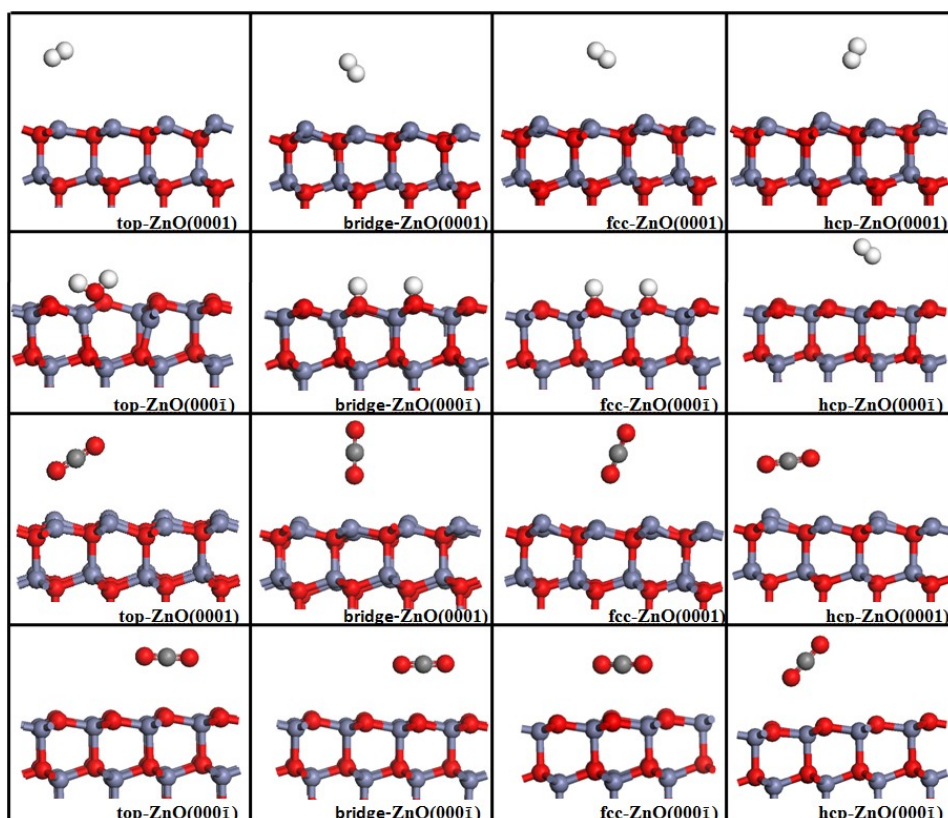

Fig. S1. The geometrical structures of CO<sub>2</sub> and H<sub>2</sub> adsorb on four different sites of clean polar ZnO(0001) and ZnO(000 $\bar{1}$ ) surfaces

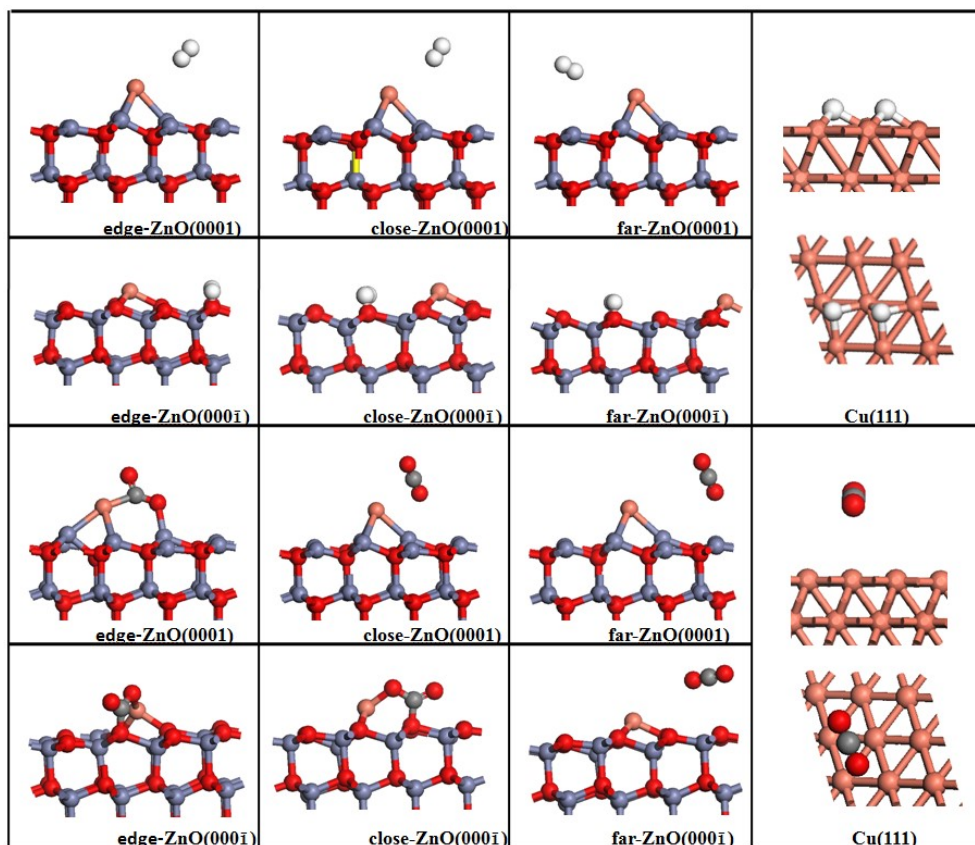

Fig. S2. The geometrical structures of CO<sub>2</sub> and H<sub>2</sub> adsorb on three different sites of polar Cu/ZnO(0001) and Cu/ZnO(000 $\bar{1}$ ) surfaces, including the CO<sub>2</sub> and H<sub>2</sub> adsorb on metallic site on Cu(111) surface.

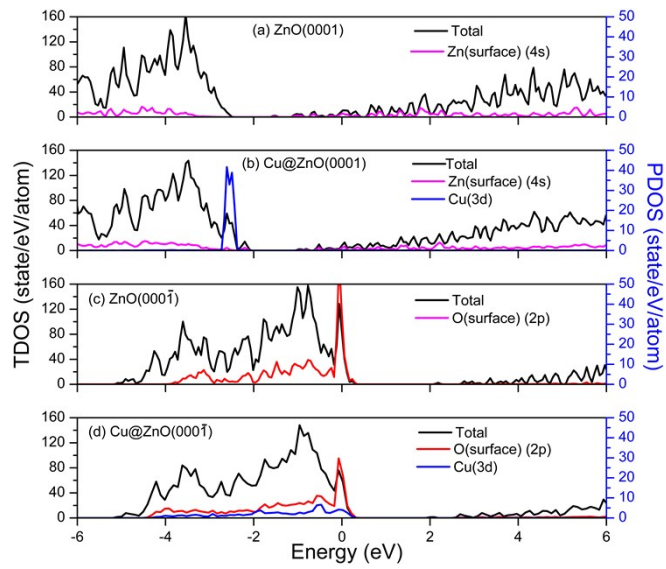

**Fig. S3** Partial density of states (PDOS) for (a) clean polar surface of ZnO(0001) , (b) Cu deposited on fcc-site of ZnO(0001), (c) clean polar surface of ZnO(000 $\bar{1}$ ), (d) Cu deposited on fcc-site of ZnO(000 $\bar{1}$ )

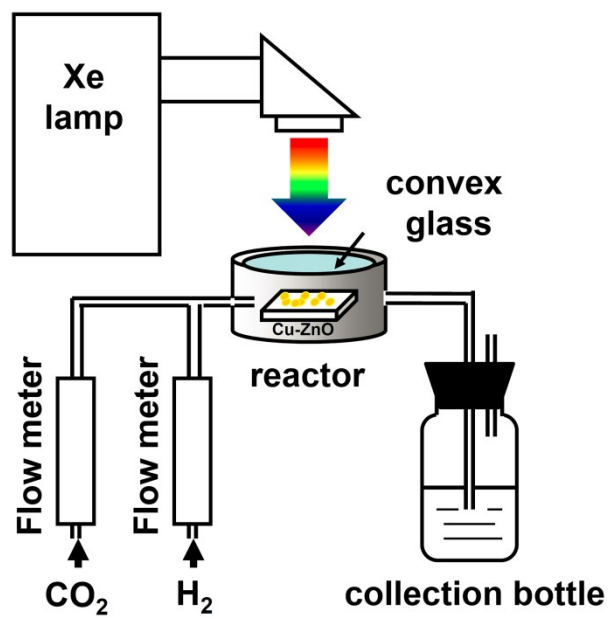

Fig. S4. Schematic illustration of the apparatus for photocatalytic experiments.

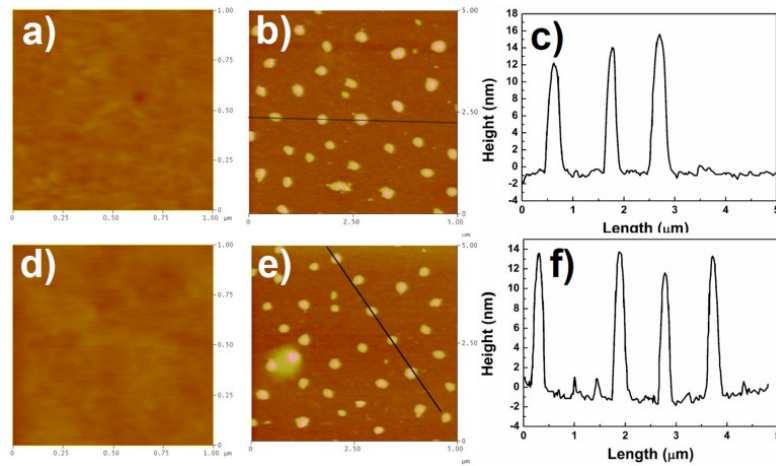

Fig. S5. (a) The morphologies of polished ZnO (0001) facet, (b) Cu nanoislands and (c) height analysis of Cu nanoislands in Cu/ZnO (0001) sample using AFM. (d) The morphologies of polished ZnO (000 $\bar{1}$ ) facet, (e) Cu nanoislands and (f) height analysis of Cu nanoislands in Cu/ZnO(000 $\bar{1}$ ) sample using AFM.

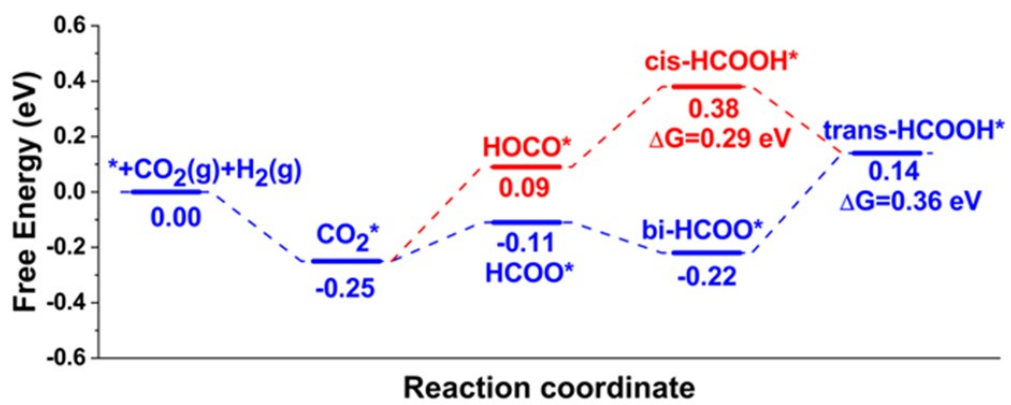

Fig. S6. The Gibbs free energy diagrams of CO<sub>2</sub> reduction calculated by PBE level without using U parameter.
